# Supplementary material for: A novel adiposity index as an integrated predictor of cardiometabolic disease morbidity and mortality
Source: PubMed Central journal article supplement (PMC6233180; doi:10.1038/s41598-018-35073-4), 2018-11-13
Supplement: 41598_2018_35073_MOESM1_ESM.pdf [file 41598_2018_35073_MOESM1_ESM.pdf]

# **A novel adiposity index as an integrated predictor of cardiometabolic disease morbidity and mortality**

Yousung Park<sup>1\*</sup>, Nam Hoon Kim<sup>2\*</sup>, Tae Yeon Kwon<sup>3</sup>, Sin Gon Kim<sup>2</sup>

<sup>1</sup>Department of Statistics, Korea University, Seoul, South Korea

<sup>2</sup>Division of Endocrinology and Metabolism, Department of Internal Medicine, Korea University College of Medicine, Seoul, South Korea

<sup>3</sup>Department of International Finance, Hankuk University of Foreign Studies, Yongin-si, Gyeonggi-do, South Korea

**Supplementary Figure 1.** Hazard ratio of 10 groups of each adiposity index on all-cause and on all-cause and cardiovascular mortality when each index was included with BMI in the model (joint effect)

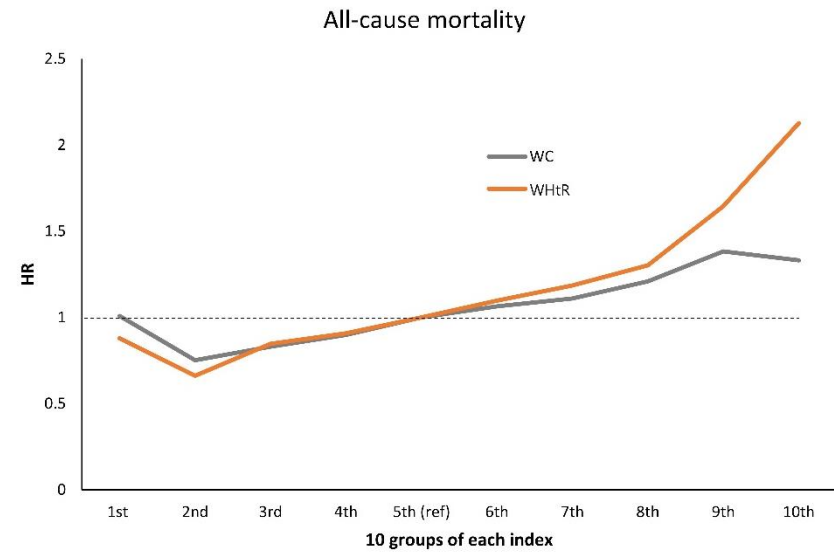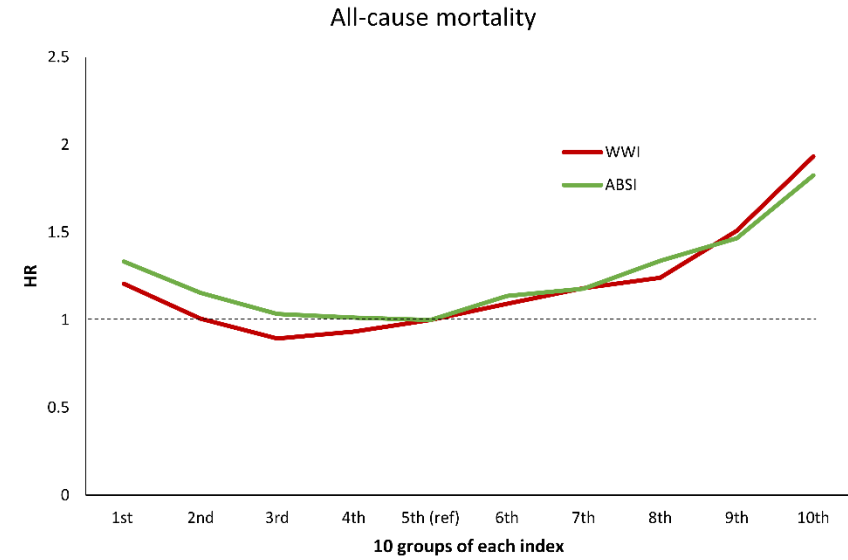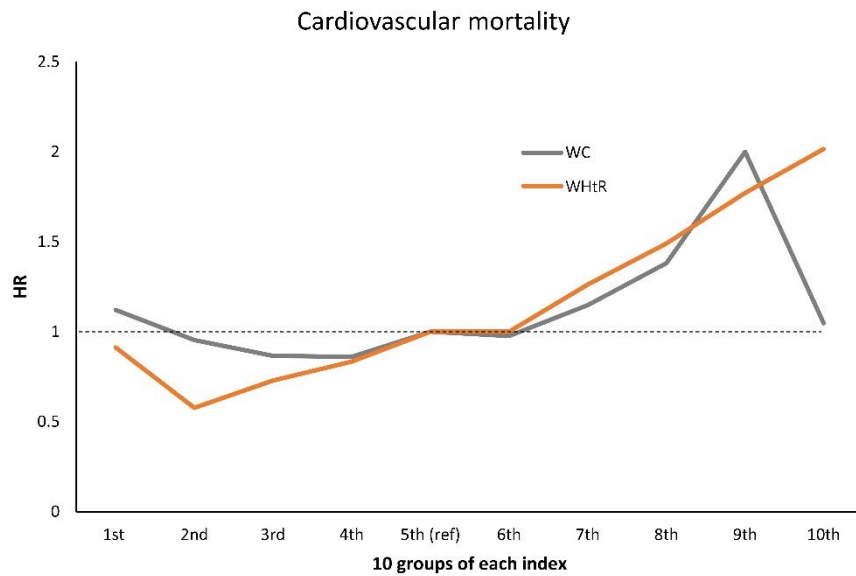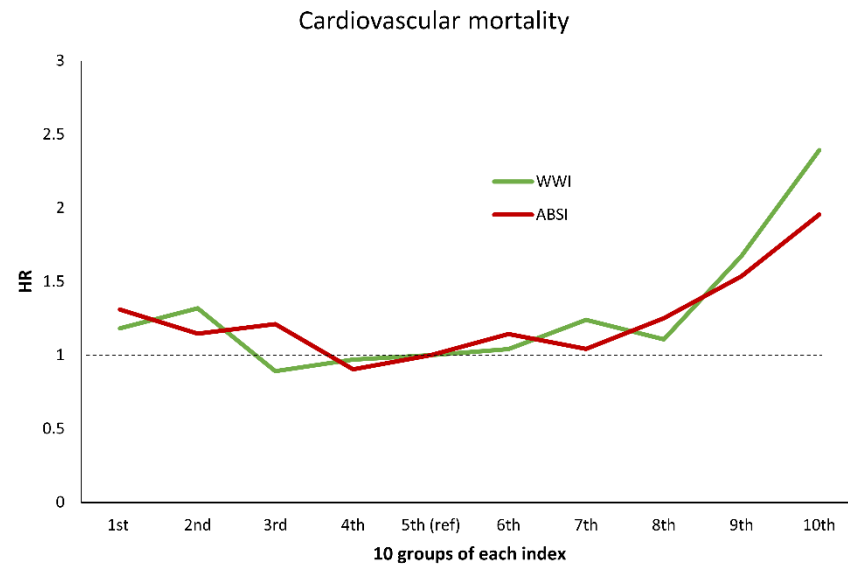

**Supplementary Figure 2.** Hazard ratio of 10 groups of each adiposity index on incident hypertension, type 2 diabetes and cardiovascular disease when each index was included with BMI in the model (joint effect).

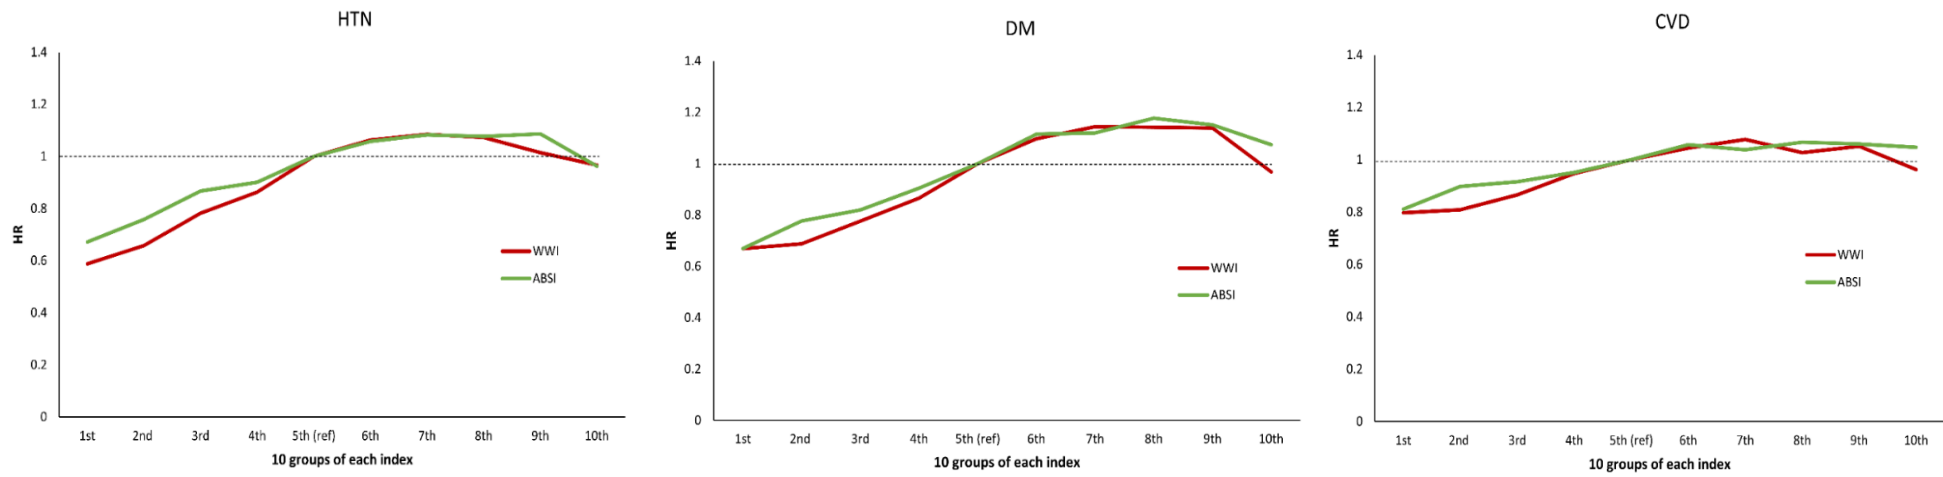

**Supplementary Table 1.** Hazard ratios and 95% confidence intervals of adiposity indices for all-cause mortality (marginal effect)

| Index |                    | 1st   | 2nd   | 3rd   | 4th   | 5th | 6th   | 7th   | 8th   | 9th   | 10th  |
|-------|--------------------|-------|-------|-------|-------|-----|-------|-------|-------|-------|-------|
| BMI   | HR                 | 2.568 | 1.887 | 1.577 | 1.175 | 1   | 0.935 | 0.843 | 0.856 | 0.813 | 1.423 |
|       | 95% CI lower limit | 2.328 | 1.72  | 1.45  | 1.081 | 1   | 0.851 | 0.753 | 0.746 | 0.664 | 1.092 |
|       | 95% CI upper limit | 2.832 | 2.071 | 1.715 | 1.277 | 1   | 1.027 | 0.944 | 0.981 | 0.995 | 1.855 |
| WC    | HR                 | 2.244 | 1.459 | 1.332 | 1.156 | 1   | 0.891 | 0.826 | 0.815 | 0.868 | 0.865 |
|       | 95% CI lower limit | 1.897 | 1.291 | 1.217 | 1.069 | 1   | 0.822 | 0.753 | 0.732 | 0.745 | 0.693 |
|       | 95% CI upper limit | 2.654 | 1.649 | 1.458 | 1.249 | 1   | 0.967 | 0.905 | 0.909 | 1.01  | 1.08  |
| WHtR  | HR                 | 1.994 | 1.267 | 1.355 | 1.166 | 1   | 0.89  | 0.837 | 0.81  | 0.885 | 1.028 |
|       | 95% CI lower limit | 1.662 | 1.115 | 1.215 | 1.073 | 1   | 0.822 | 0.759 | 0.738 | 0.776 | 0.888 |
|       | 95% CI upper limit | 2.392 | 1.441 | 1.512 | 1.268 | 1   | 0.963 | 0.923 | 0.889 | 1.011 | 1.189 |
| WWI   | HR                 | 1.532 | 1.261 | 1.049 | 1.017 | 1   | 1.023 | 1.063 | 1.089 | 1.309 | 1.793 |
|       | 95% CI lower limit | 1.16  | 1.041 | 0.911 | 0.911 | 1   | 0.941 | 0.972 | 0.993 | 1.18  | 1.593 |
|       | 95% CI upper limit | 2.025 | 1.526 | 1.208 | 1.134 | 1   | 1.113 | 1.164 | 1.195 | 1.452 | 2.019 |
| ABSI  | HR                 | 1.372 | 1.205 | 1.063 | 1.024 | 1   | 1.128 | 1.187 | 1.372 | 1.562 | 2.257 |
|       | 95% CI lower limit | 1.073 | 1.005 | 0.931 | 0.917 | 1   | 1.032 | 1.082 | 1.255 | 1.411 | 2.023 |
|       | 95% CI upper limit | 1.755 | 1.444 | 1.213 | 1.142 | 1   | 1.233 | 1.303 | 1.5   | 1.729 | 2.517 |

**Supplementary Table 2.** Hazard ratios and 95% confidence intervals of adiposity indices for cardiovascular mortality (marginal effect)

| Index |                    | 1st   | 2nd   | 3rd   | 4th   | 5th | 6th   | 7th   | 8th   | 9th   | 10th  |
|-------|--------------------|-------|-------|-------|-------|-----|-------|-------|-------|-------|-------|
| BMI   | HR                 | 2.129 | 1.273 | 1.287 | 1.045 | 1   | 0.976 | 1.125 | 1.075 | 0.74  | 0.958 |
|       | 95% CI lower limit | 1.629 | 0.966 | 1.018 | 0.831 | 1   | 0.76  | 0.853 | 0.763 | 0.411 | 0.392 |
|       | 95% CI upper limit | 2.782 | 1.677 | 1.628 | 1.314 | 1   | 1.254 | 1.485 | 1.514 | 1.331 | 2.339 |
| WC    | HR                 | 1.992 | 1.502 | 1.169 | 1.003 | 1   | 0.884 | 0.967 | 1.089 | 1.437 | 0.673 |
|       | 95% CI lower limit | 1.258 | 1.085 | 0.903 | 0.802 | 1   | 0.703 | 0.757 | 0.829 | 1.016 | 0.331 |
|       | 95% CI upper limit | 3.154 | 2.08  | 1.512 | 1.255 | 1   | 1.111 | 1.235 | 1.431 | 2.032 | 1.369 |
| WHtR  | HR                 | 1.867 | 1.004 | 1.068 | 1.012 | 1   | 0.857 | 0.99  | 1.068 | 1.125 | 1.094 |
|       | 95% CI lower limit | 1.109 | 0.674 | 0.762 | 0.791 | 1   | 0.684 | 0.765 | 0.842 | 0.811 | 0.75  |
|       | 95% CI upper limit | 3.143 | 1.494 | 1.498 | 1.296 | 1   | 1.074 | 1.28  | 1.353 | 1.56  | 1.596 |
| WWI   | HR                 | 1.328 | 1.489 | 0.975 | 1.017 | 1   | 1.004 | 1.173 | 1.031 | 1.542 | 2.328 |
|       | 95% CI lower limit | 0.54  | 0.867 | 0.628 | 0.733 | 1   | 0.785 | 0.911 | 0.791 | 1.17  | 1.724 |
|       | 95% CI upper limit | 3.265 | 2.558 | 1.514 | 1.411 | 1   | 1.285 | 1.51  | 1.344 | 2.033 | 3.145 |
| ABSI  | HR                 | 1.306 | 1.163 | 1.226 | 0.908 | 1   | 1.137 | 1.041 | 1.259 | 1.573 | 2.191 |
|       | 95% CI lower limit | 0.634 | 0.678 | 0.853 | 0.656 | 1   | 0.888 | 0.799 | 0.983 | 1.2   | 1.647 |
|       | 95% CI upper limit | 2.69  | 1.996 | 1.76  | 1.258 | 1   | 1.457 | 1.358 | 1.611 | 2.061 | 2.916 |

**Supplementary Table 3.** Hazard ratios and 95% confidence intervals of adiposity indices for diseases of HTN, DM, and CVD (marginal effect)

| Disease | Index |                    | 1st   | 2nd   | 3rd   | 4th   | 5th | 6th   | 7th   | 8th   | 9th   | 10th  |
|---------|-------|--------------------|-------|-------|-------|-------|-----|-------|-------|-------|-------|-------|
| HTN     | WWI   | HR                 | 0.434 | 0.503 | 0.655 | 0.785 | 1   | 1.15  | 1.23  | 1.258 | 1.255 | 1.111 |
|         |       | 95% CI lower limit | 0.399 | 0.479 | 0.634 | 0.765 | 1   | 1.125 | 1.2   | 1.225 | 1.213 | 1.06  |
|         |       | 95% CI upper limit | 0.472 | 0.528 | 0.676 | 0.806 | 1   | 1.175 | 1.26  | 1.292 | 1.298 | 1.164 |
|         | ABSI  | HR                 | 0.709 | 0.737 | 0.849 | 0.896 | 1   | 1.042 | 1.029 | 0.968 | 0.926 | 0.681 |
|         |       | 95% CI lower limit | 0.668 | 0.708 | 0.825 | 0.875 | 1   | 1.019 | 1.003 | 0.943 | 0.893 | 0.648 |
|         |       | 95% CI upper limit | 0.752 | 0.766 | 0.873 | 0.918 | 1   | 1.065 | 1.055 | 0.994 | 0.959 | 0.716 |
| DM      | WWI   | HR                 | 0.532 | 0.579 | 0.695 | 0.853 | 1   | 1.097 | 1.186 | 1.24  | 1.297 | 1.059 |
|         |       | 95% CI lower limit | 0.486 | 0.553 | 0.672 | 0.828 | 1   | 1.067 | 1.152 | 1.203 | 1.246 | 1.006 |
|         |       | 95% CI upper limit | 0.581 | 0.606 | 0.719 | 0.879 | 1   | 1.128 | 1.222 | 1.279 | 1.352 | 1.114 |
|         | ABSI  | HR                 | 0.693 | 0.764 | 0.811 | 0.903 | 1   | 1.101 | 1.079 | 1.09  | 1.033 | 0.857 |
|         |       | 95% CI lower limit | 0.648 | 0.731 | 0.785 | 0.878 | 1   | 1.073 | 1.047 | 1.057 | 0.991 | 0.809 |
|         |       | 95% CI upper limit | 0.742 | 0.8   | 0.838 | 0.929 | 1   | 1.13  | 1.111 | 1.125 | 1.076 | 0.909 |
| CVD     | WWI   | HR                 | 0.709 | 0.727 | 0.81  | 0.925 | 1   | 1.047 | 1.125 | 1.101 | 1.145 | 1.054 |
|         |       | 95% CI lower limit | 0.642 | 0.69  | 0.78  | 0.894 | 1   | 1.015 | 1.089 | 1.066 | 1.097 | 1.001 |
|         |       | 95% CI upper limit | 0.785 | 0.766 | 0.841 | 0.956 | 1   | 1.08  | 1.162 | 1.138 | 1.196 | 1.11  |
|         | ABSI  | HR                 | 0.823 | 0.883 | 0.906 | 0.947 | 1   | 1.052 | 1.015 | 1.018 | 0.991 | 0.892 |
|         |       | 95% CI lower limit | 0.762 | 0.84  | 0.873 | 0.917 | 1   | 1.022 | 0.982 | 0.985 | 0.949 | 0.842 |
|         |       | 95% CI upper limit | 0.888 | 0.929 | 0.941 | 0.978 | 1   | 1.083 | 1.048 | 1.053 | 1.035 | 0.944 |

**Supplementary Table 4.** Hazard ratios and 95% confidence intervals of adiposity indices for all-cause mortality when each index was included with BMI in the model (joint effect).

| Index |                    | 1st   | 2nd   | 3rd   | 4th   | 5th | 6th   | 7th   | 8th   | 9th   | 10th  |
|-------|--------------------|-------|-------|-------|-------|-----|-------|-------|-------|-------|-------|
| WC    | HR                 | 1.009 | 0.752 | 0.831 | 0.899 | 1   | 1.064 | 1.11  | 1.209 | 1.383 | 1.331 |
|       | 95% CI lower limit | 0.837 | 0.655 | 0.752 | 0.829 | 1   | 0.978 | 1.004 | 1.069 | 1.16  | 1.023 |
|       | 95% CI upper limit | 1.215 | 0.863 | 0.919 | 0.975 | 1   | 1.157 | 1.227 | 1.368 | 1.648 | 1.732 |
| WHtR  | HR                 | 0.879 | 0.662 | 0.847 | 0.908 | 1   | 1.098 | 1.186 | 1.303 | 1.645 | 2.127 |
|       | 95% CI lower limit | 0.72  | 0.575 | 0.754 | 0.833 | 1   | 1.012 | 1.068 | 1.173 | 1.415 | 1.779 |
|       | 95% CI upper limit | 1.072 | 0.762 | 0.952 | 0.99  | 1   | 1.192 | 1.316 | 1.449 | 1.912 | 2.544 |
| WWI   | HR                 | 1.207 | 1.008 | 0.894 | 0.934 | 1   | 1.093 | 1.182 | 1.241 | 1.509 | 1.933 |
|       | 95% CI lower limit | 0.912 | 0.832 | 0.776 | 0.837 | 1   | 1.004 | 1.08  | 1.131 | 1.36  | 1.717 |
|       | 95% CI upper limit | 1.596 | 1.221 | 1.03  | 1.042 | 1   | 1.189 | 1.294 | 1.362 | 1.675 | 2.177 |
| ABSI  | HR                 | 1.334 | 1.155 | 1.035 | 1.014 | 1   | 1.137 | 1.179 | 1.338 | 1.466 | 1.825 |
|       | 95% CI lower limit | 1.043 | 0.963 | 0.907 | 0.908 | 1   | 1.04  | 1.075 | 1.224 | 1.324 | 1.634 |
|       | 95% CI upper limit | 1.707 | 1.385 | 1.182 | 1.131 | 1   | 1.243 | 1.294 | 1.463 | 1.623 | 2.04  |

**Supplementary Table 5.** Hazard ratios and 95% confidence intervals of adiposity indices for cardiovascular mortality when each index was included with BMI in the model (joint effect).

| Index |                    | 1st   | 2nd   | 3rd   | 4th   | 5th | 6th   | 7th   | 8th   | 9th   | 10th  |
|-------|--------------------|-------|-------|-------|-------|-----|-------|-------|-------|-------|-------|
| WC    | HR                 | 1.121 | 0.954 | 0.866 | 0.861 | 1   | 0.977 | 1.148 | 1.381 | 2     | 1.048 |
|       | 95% CI lower limit | 0.673 | 0.658 | 0.651 | 0.681 | 1   | 0.772 | 0.88  | 1.01  | 1.33  | 0.48  |
|       | 95% CI upper limit | 1.866 | 1.381 | 1.153 | 1.087 | 1   | 1.237 | 1.497 | 1.887 | 3.008 | 2.288 |
| WHtR  | HR                 | 0.913 | 0.577 | 0.729 | 0.834 | 1   | 1     | 1.263 | 1.491 | 1.771 | 2.016 |
|       | 95% CI lower limit | 0.52  | 0.376 | 0.511 | 0.647 | 1   | 0.793 | 0.96  | 1.137 | 1.219 | 1.282 |
|       | 95% CI upper limit | 1.6   | 0.887 | 1.042 | 1.075 | 1   | 1.261 | 1.661 | 1.957 | 2.574 | 3.169 |
| WWI   | HR                 | 1.182 | 1.319 | 0.891 | 0.97  | 1   | 1.041 | 1.24  | 1.107 | 1.673 | 2.393 |
|       | 95% CI lower limit | 0.48  | 0.766 | 0.573 | 0.699 | 1   | 0.813 | 0.961 | 0.848 | 1.266 | 1.77  |
|       | 95% CI upper limit | 2.911 | 2.27  | 1.386 | 1.347 | 1   | 1.333 | 1.598 | 1.446 | 2.21  | 3.234 |
| ABSI  | HR                 | 1.31  | 1.146 | 1.211 | 0.904 | 1   | 1.144 | 1.043 | 1.251 | 1.536 | 1.955 |
|       | 95% CI lower limit | 0.636 | 0.667 | 0.843 | 0.653 | 1   | 0.893 | 0.8   | 0.977 | 1.171 | 1.462 |
|       | 95% CI upper limit | 2.7   | 1.967 | 1.74  | 1.251 | 1   | 1.466 | 1.359 | 1.603 | 2.014 | 2.615 |



**Supplementary Table 6.** Hazard ratios and 95% confidence intervals of adiposity indices of HTN, DM, and CVD when each index was included with BMI in the model (joint effect).

| Disease | Index |                    | 1st   | 2nd   | 3rd   | 4th   | 5th | 6th   | 7th   | 8th   | 9th   | 10th  |
|---------|-------|--------------------|-------|-------|-------|-------|-----|-------|-------|-------|-------|-------|
| HTN     | WWI   | HR                 | 0.588 | 0.658 | 0.782 | 0.863 | 1   | 1.063 | 1.085 | 1.073 | 1.015 | 0.967 |
|         |       | 95% CI lower limit | 0.54  | 0.627 | 0.757 | 0.841 | 1   | 1.04  | 1.058 | 1.045 | 0.981 | 0.922 |
|         |       | 95% CI upper limit | 0.639 | 0.692 | 0.808 | 0.886 | 1   | 1.086 | 1.112 | 1.102 | 1.05  | 1.013 |
|         | ABSI  | HR                 | 0.672 | 0.758 | 0.867 | 0.901 | 1   | 1.058 | 1.083 | 1.077 | 1.087 | 0.963 |
|         |       | 95% CI lower limit | 0.634 | 0.729 | 0.843 | 0.879 | 1   | 1.035 | 1.056 | 1.049 | 1.048 | 0.916 |
|         |       | 95% CI upper limit | 0.713 | 0.788 | 0.892 | 0.923 | 1   | 1.082 | 1.11  | 1.106 | 1.126 | 1.013 |
| DM      | WWI   | HR                 | 0.669 | 0.688 | 0.776 | 0.866 | 1   | 1.097 | 1.144 | 1.142 | 1.139 | 0.968 |
|         |       | 95% CI lower limit | 0.614 | 0.652 | 0.747 | 0.84  | 1   | 1.069 | 1.111 | 1.107 | 1.095 | 0.915 |
|         |       | 95% CI upper limit | 0.728 | 0.725 | 0.805 | 0.892 | 1   | 1.125 | 1.178 | 1.179 | 1.185 | 1.025 |
|         | ABSI  | HR                 | 0.67  | 0.777 | 0.82  | 0.905 | 1   | 1.115 | 1.12  | 1.177 | 1.151 | 1.074 |
|         |       | 95% CI lower limit | 0.626 | 0.743 | 0.793 | 0.88  | 1   | 1.087 | 1.088 | 1.141 | 1.104 | 1.012 |
|         |       | 95% CI upper limit | 0.717 | 0.813 | 0.847 | 0.931 | 1   | 1.145 | 1.154 | 1.214 | 1.2   | 1.139 |
| CVD     | WWI   | HR                 | 0.797 | 0.809 | 0.866 | 0.947 | 1   | 1.044 | 1.077 | 1.027 | 1.051 | 0.962 |
|         |       | 95% CI lower limit | 0.722 | 0.761 | 0.83  | 0.915 | 1   | 1.015 | 1.043 | 0.993 | 1.008 | 0.909 |
|         |       | 95% CI upper limit | 0.879 | 0.859 | 0.905 | 0.98  | 1   | 1.074 | 1.112 | 1.063 | 1.096 | 1.018 |
|         | ABSI  | HR                 | 0.811 | 0.898 | 0.916 | 0.951 | 1   | 1.057 | 1.038 | 1.067 | 1.06  | 1.047 |
|         |       | 95% CI lower limit | 0.751 | 0.853 | 0.883 | 0.921 | 1   | 1.027 | 1.005 | 1.033 | 1.015 | 0.988 |
|         |       | 95% CI upper limit | 0.875 | 0.944 | 0.951 | 0.982 | 1   | 1.088 | 1.072 | 1.103 | 1.107 | 1.11  |
